# Supplementary material for: Insight into the structure of black coatings of ancient Egyptian mummies by advanced Electron magnetic resonance of vanadyl complexes
Source: Copernicus journal article supplement (doi:10.5194/mr-2022-10), 2022-05-16
Supplement: Supplementary file 1 [file mr-2022-10-supplement.pdf]

## Supplementary information:

### Insight into the structure of black coatings of ancient Egyptian mummies by advanced Electron magnetic resonance of vanadyl complexes.

Charles E. Dutoit,<sup>1</sup> Laurent Binet,<sup>1</sup> Hervé Vezin,<sup>2</sup> Océane Anduze,<sup>1</sup> Agnès Lattuati-Derieux,<sup>3</sup> Didier Gourier<sup>1</sup>

<sup>1</sup> Chimie-ParisTech, PSL University, CNRS, Institut de Recherche de Chimie-Paris (IRCP), F-75005 Paris, France

<sup>3</sup> Centre de Recherche et de Restauration des Musées de France (C2RMF), Palais du Louvre, F-75001 Paris, France

<sup>2</sup> Université de Lille, CNRS, UMR8516-LASIRE, F-59000 Lille, France.

*Correspondence to* : Didier Gourier (didier.gourier@chimieparistech.psl.eu)

#### Table of content :

|                                                                                                                 |
|-----------------------------------------------------------------------------------------------------------------|
| S1 Samples                                                                                                      |
| S2 EPR spectra                                                                                                  |
| S3 ENDOR spectra                                                                                                |
| S4 Derivation of Equation 1                                                                                     |
| S5 HYSORE spectra of <i>Ref 2</i>                                                                               |
| S6 Estimation of second order contribution in <sup>14</sup> N parameters from dq-dq and sq-dq correlation peaks |

26

**S1 Samples**

27

28 **Table S1.** Description of samples

| <b>Samples</b> | <b>Object</b>                        | <b>Provenance</b>                                                | <b>Origin /Dating</b>                                     | <b>Description</b>                                                                                                         |
|----------------|--------------------------------------|------------------------------------------------------------------|-----------------------------------------------------------|----------------------------------------------------------------------------------------------------------------------------|
| <i>Ref 1</i>   | Natural asphalt                      | C2RMF                                                            | Dead Sea, floating blocks (Late Cretaceous)               | Black solid                                                                                                                |
| <i>Ref 2</i>   | Bitumen of Judea                     | C2RMF                                                            | Commercial                                                | Brown powder                                                                                                               |
| <i>Hum 1</i>   | Anthropomorphic coffin               | The Art and History museum of Narbonne, France (Ref: C2RMF76267) | Upper Egypt (Abydos ?). Ptolemaic period (332 BC – 30 BC) | Coffin of Irethorerou, servant of Khonsou, of the White Crown and of Horus. Black matter covering the bottom of the coffin |
| <i>Hum 2</i>   | Human mummy                          | The Hieron museum, Paray-le-Monial, France (Ref: FZ30827)        | Late Period, end of the IV <sup>th</sup> century BC       | Mummy of a 35-45 years old man, named ...djeb. Set of crossed bands, coated with dark matter                               |
| <i>Hum 3</i>   | Human mummy                          | Museum of Boulogne, France (Ref. 35906)                          | Late period, XXV <sup>th</sup> dynasty (744 BC - 656 BC)  | Mummy found in the coffin of Nehemsimontou, coated with black matter.                                                      |
| <i>An 1</i>    | Ram mummy                            | The Louvre museum, Paris, France; (Ref: C2RMF 64621)             | Upper Egypt (Elephantine). Late period (672 BC–322 BC)    | Fragment of black matter covering the mummy                                                                                |
| <i>An 2</i>    | Ram mummy                            | The Thomas Dobrée museum, Nantes, France (Ref: C2RMF36230)       | Upper Egypt. Late Period (664 BC – 332 BC).               | Fragments of black matter covering the mummy.                                                                              |
| <i>An 3</i>    | Ram mummy (the same as <b>An 2</b> ) | The Thomas Dobrée museum, Nantes, France (Ref: C2RMF36230)       | Upper Egypt. Late Period (664 BC – 332 BC).               | fragments of tissue strips covering the mummy, coated with a brown material                                                |
| <i>An 4</i>    | Crocodile mummy                      | Musée des confluences, Lyon, France (Ref : 90001841)             | Upper Egypt (Kom Ombo). Ptolemaic period                  | Posterior part of mummified crocodile skull, covered with black matter.                                                    |

29

30

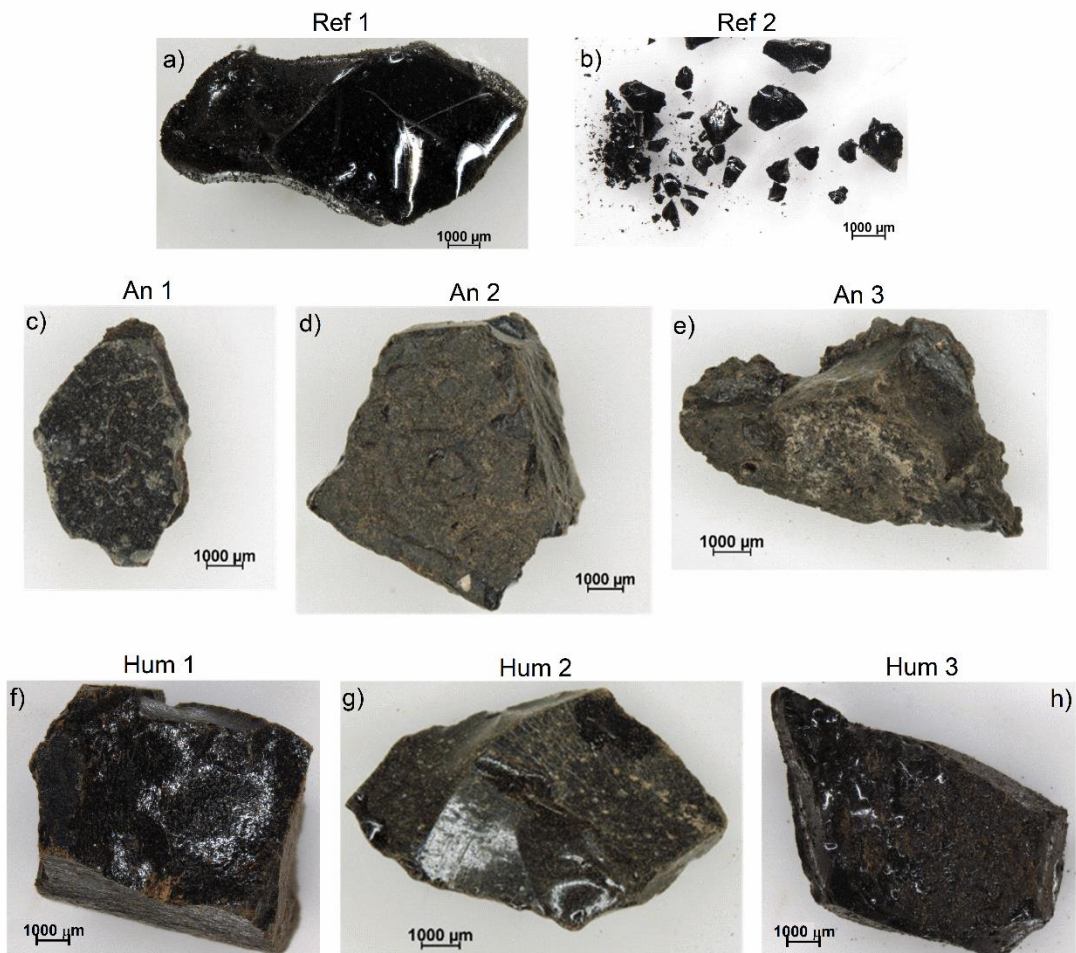

31

**Figure S1.** Binocular photographs of the samples studied in this work. © C2RMF.

32

33

34

35

36

37

38

39

40

41

42

### S2 EPR spectra:

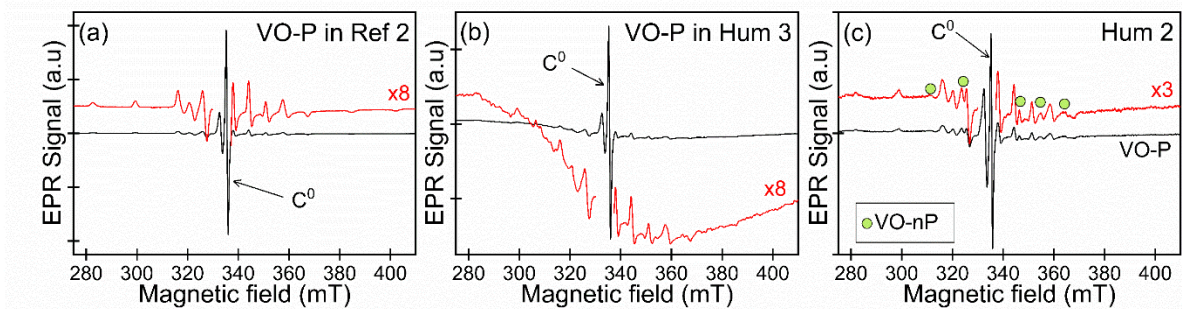

43

**Figure S2.** EPR spectra at X band and at room temperature of bitumen reference and human mummies: (a) *Ref 2*, (b) *Hum 3* and (c) *Hum 2*. This highlights the lack of VO-nP complexes (green circles) in *Ref 2* and *Hum 3*. (From Dutoit, et al., 2020)

44

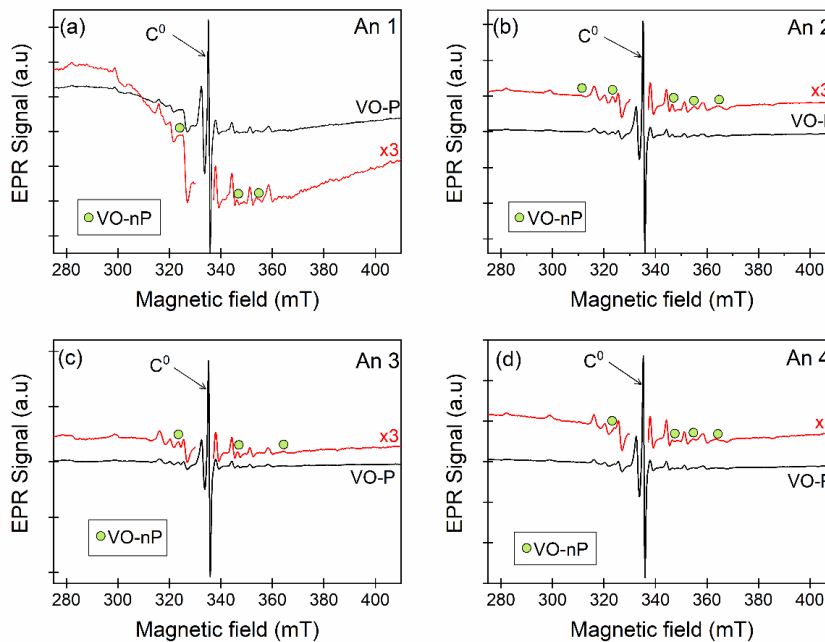

45

46

**Figure S3.** EPR spectra at X band and at room temperature of animal mummies, highlighting EPR lines of VO-nP complexes in (green circles). (From Dutoit, et al., 2020)

47

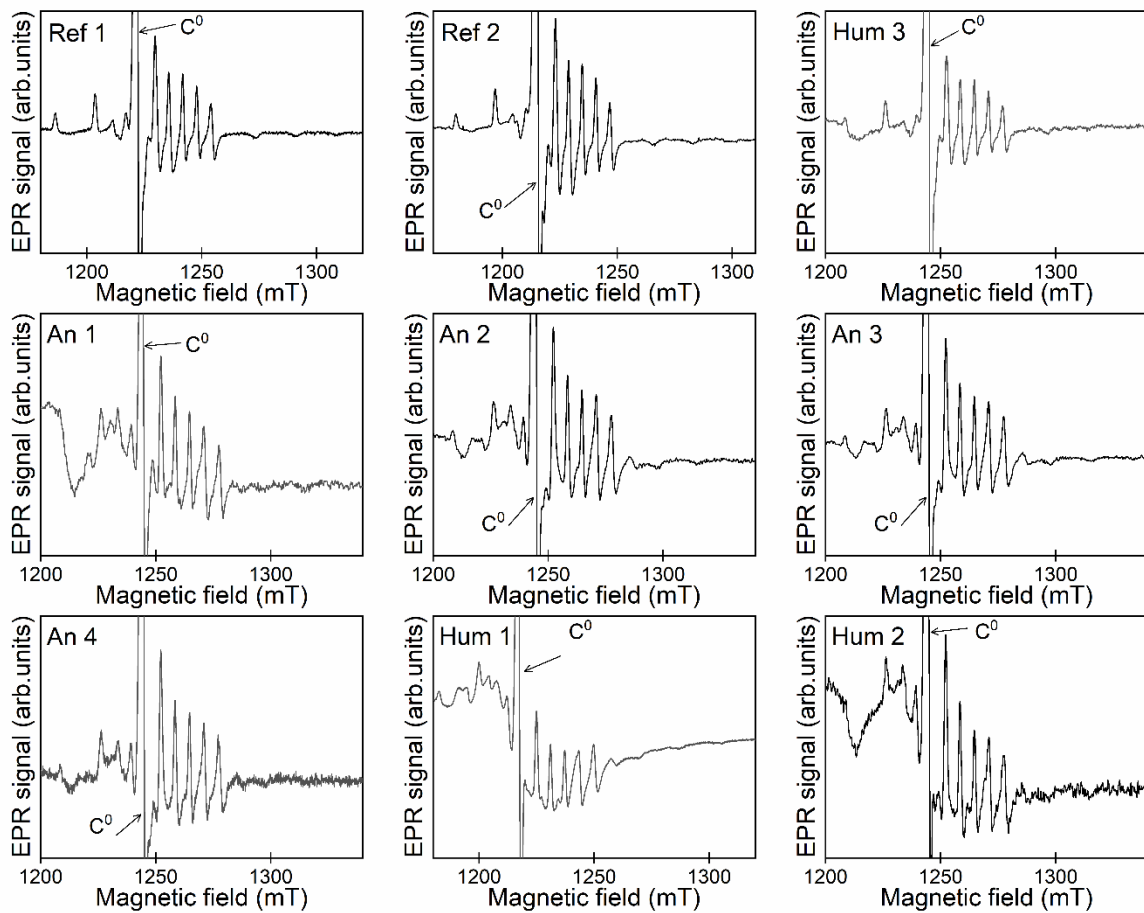

48  
49

**Figure S4.** EPR spectra at Q band and at 100 K of the reference bitumen and samples of black coatings.

50

51  
52

### S3 ENDOR spectra

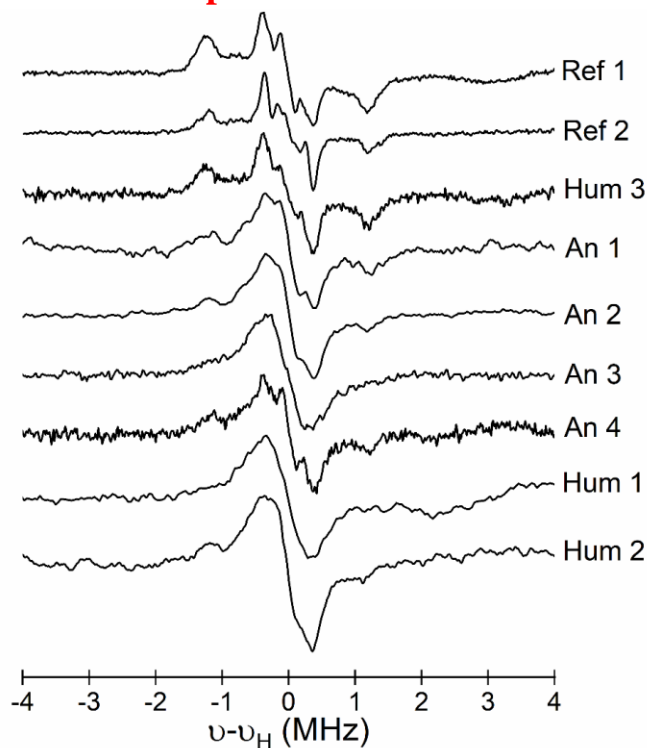

53  
54

**Figure S5.** <sup>1</sup>H ENDOR spectra at Q band and at 100K of the reference bitumen and samples of black coatings.

55

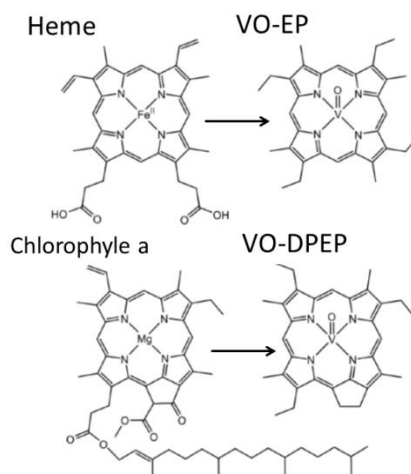

56  
57

**Figure S6.** Two examples of geoporphyryns commonly found in oil, with the corresponding parent biomolecules

58

59  
60

## S4 Derivation of Equation 1

61 The  $^1\text{H}$  ENDOR spectrum is the superposition of two independent signals: (i) one from the protons of the  $\text{C-H}_{\text{meso}}$   
62 bridges linking pyrrole groups of porphyrin ligands, hereafter referred to as VOP- $^1\text{H}$ , and (ii) the other one from the  
63 matrix protons, hereafter referred to as M- $^1\text{H}$ , corresponding to protons of asphaltene, of the natural substances of  
64 the black matter, and of protons of alkyl substituent in porphyrin ligands. M- $^1\text{H}$  protons are characterized by a pure  
65 dipolar hf interaction while VOP- $^1\text{H}$  protons are characterized by an isotropic hf interaction in addition to the dipolar  
66 one.

67 Let  $X$  be the signal height at the frequency  $\nu_{\parallel}$  corresponding to the parallel component of the VOP- $^1\text{H}$  signal and  $Y$   
68 the signal height at the maximum of perpendicular component of the VOP- $^1\text{H}$  at frequency  $\nu_{\perp}$  (see Fig.4a). Let also  
69  $X_{VOP}$ ,  $X_M$ ,  $Y_{VOP}$  and  $Y_M$  be the respective contributions of a *single* VOP molecule and a *single* M- $^1\text{H}$  to  $X$  and  $Y$ .  
70 Then :

$$71 \quad \frac{X}{Y} = \frac{N_{VOP}X_{VOP} + N_M X_M}{N_{VOP}Y_{VOP} + N_M Y_M} \quad (\text{S1})$$

72 where  $N_{VOP}$  and  $N_M$  are the total numbers of VOP molecules and matrix protons in the sample, respectively.

73 The VOP molecules are embedded in bitumen aggregates spread within a bioorganic matrix, which contains the M-  
74  $^1\text{H}$ 's. As the M- $^1\text{H}$ 's are detected upon saturating an EPR transition of the VOP molecules, they must have a residual  
75 dipolar hf interaction with the VOP's. We thus assume that the detected M- $^1\text{H}$ 's are in a layer of volume  $V_L$   
76 surrounding a bitumen aggregate (Fig. S7), then  $N_M = N_A V_L [H]$  where  $N_A$  is the total number of bitumen aggregate  
77 in the sample and  $[H]$  the concentration of M- $^1\text{H}$ 's in the matrix. We also have  $N_{VOP} = [VOP]V$ , with  $[VOP]$  the  
78 concentration of VOP's in the sample and  $V$ , the sample volume. As the experimental variable is  $x =$   
79  $[VOP]/[VOP]_{ref}$ , where  $[VOP]_{ref}$  is the VOP concentration in the reference sample **Ref 1**,  $N_{VOP}$  is then rewritten

80 as  $N_{VOP} = x[VOP]_{ref}V$ , yielding:  $\frac{N_M}{N_{VOP}} = \frac{a}{x}$ , with  $a = N_A \frac{V_L}{V} \frac{[H]}{[VOP]_{ref}}$ . Finally, we obtain:

$$81 \quad \frac{X}{Y} = \frac{X_{VOP}}{Y_{VOP}} \times \frac{x + aX_M / X_{VOP}}{x + aY_M / Y_{VOP}} \quad (\text{S2})$$

82 From the ENDOR spectrum of **Ref 1** dominantly made of the contribution of VOP- $^1\text{H}$  signal and negligible  
83 contribution from M- $^1\text{H}$ , we get  $\frac{X_{VOP}}{Y_{VOP}} \approx 0.625$  and assuming a gaussian lineshape for the M- $^1\text{H}$  ENDOR line, we get  
84  $\frac{X_M}{Y_M} \approx 0.03$  giving  $\frac{X_M}{X_{VOP}} \approx 0.048 \frac{Y_M}{Y_{VOP}}$  and finally:

$$85 \quad \frac{X}{Y} \approx 0.625 \times \frac{x + 0.048 \times b}{x + b} \quad (\text{S3})$$

86 with a single adjustable parameter  $b = a \frac{Y_M}{Y_{VO-P}}$ , which depends on the sizes and dispersion of the bitumen aggregates  
87 through  $N_A$  and the ratio  $\frac{V_L}{V}$ .

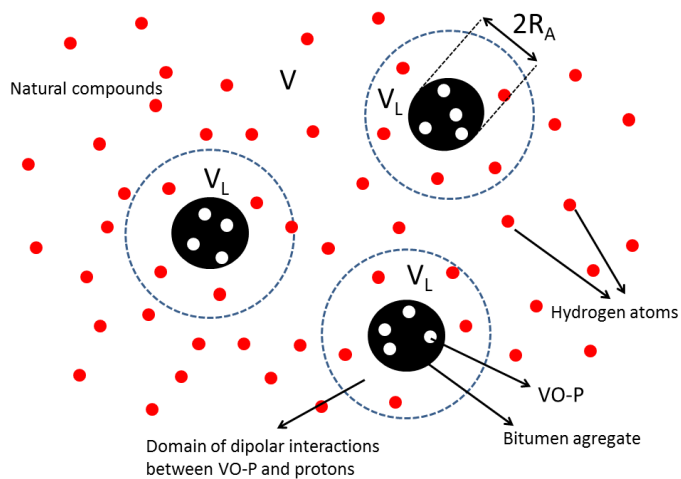

88

89

**Figure S7.** Schematic description of a bitumen aggregate in interaction with protons of bioorganic compounds.



90  
91

## S5 HYSORE spectra of Ref 2

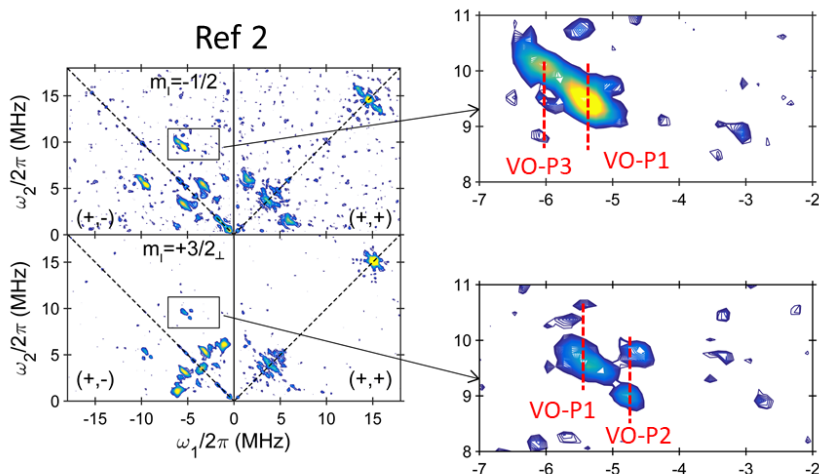

92  
93

**Figure S8.** HYSORE spectra of *Ref 2* recorded by observing the two EPR transitions  $m_I = -1/2$  and  $m_I = +3/2_{\perp}$ . Figures on the right show the portions of spectra corresponding to the frequency range of dq-dq correlations. Correlations sq-dq are not clearly detected because the VO-P content is lower in *Ref 2* than in *Ref 1*.

94  
95  
96  
97

## S6 Estimation of second order contributions in $^{14}\text{N}$ parameters from dq-dq and sq-dq correlation peaks

98 The first order nuclear spin energy levels of a single  $m_s$  state of  $\text{VO}^{2+}$  interacting with the nuclear spin  $I = 1$  of a  $^{14}\text{N}$   
99 nucleus is given by:

$$100 \quad E = \pm \frac{1}{2} A m_I + Q \left( \frac{3}{2} m_I^2 - 1 \right) - \nu_N m_I \quad (\text{S4})$$

101 where the energy  $E$ , the hf interaction  $A$  and the quadrupolar interaction  $Q$  are taken along the direction of the magnetic  
102 field. The corresponding energy level diagram is given in Fig. S9 for the two  $m_s$  states. The frequencies of the single  
103 quantum ( $\Delta m_I = \pm 1$ ) and double quantum ( $\Delta m_I = \pm 2$ ) nuclear spin transitions of  $^{14}\text{N}$  are given by (Reijerse, et al.,  
104 1998; Dikanov, et al., 2004):

$$105 \quad \begin{aligned} \nu_{1sq}^{\pm} &= \frac{A}{2} \pm \nu_N + \frac{3Q}{2} + (2^{\text{nd}} \text{ order terms}) \\ \nu_{2sq}^{\pm} &= \frac{A}{2} \pm \nu_N - \frac{3Q}{2} + (2^{\text{nd}} \text{ order terms}) \end{aligned} \quad (\text{S5})$$

$$106 \quad \nu_{dq}^{\pm} = A \pm 2\nu_N + \frac{A^{(2)}}{(A/2) \pm \nu_N} \quad (\text{S6})$$

107 The second order corrections  $\nu^{(2)}$  to the single quantum frequencies  $\nu_{1sq}^{\pm}$  and  $\nu_{2sq}^{\pm}$  are:

$$108 \quad \begin{aligned} \nu_{1,2sq}^{(2)+} &= \left( A^{(2)} \pm Q^{(2)} \right) / (A - 2\nu_N) \\ \nu_{1,2sq}^{(2)-} &= \left( A^{(2)} \pm Q^{(2)} \right) / (A + 2\nu_N) \end{aligned} \quad (S7)$$

109 where

$$110 \quad \begin{aligned} A^{(2)} &= 1/4(T_{np}^2 + T_{nq}^2) + K^2(3 + \eta^2) - 3Q_n^2/4 \\ Q^{(2)} &= 3(Q_{np}T_{np} + Q_{nq}T_{nq}) \end{aligned} \quad (S8)$$

111  $K = e^2qQ/4h$  is the quadrupolar coupling constant. The matrix elements  $T_{np}$  and  $T_{nq}$  in  $A^{(2)}$  and  $Q^{(2)}$  are  
112 anisotropic components of the hf interaction,  $\mathbf{n}$  is the orientation of the magnetic field, and  $\mathbf{p}$  and  $\mathbf{q}$  are two orientations  
113 perpendicular to  $\mathbf{n}$  and to each other.

114 Determination of  $A$  from expressions of  $\nu_{dq}^{\pm}$  is not affected by 2<sup>nd</sup> order correction:

$$115 \quad A = \frac{2\nu_N(\nu_{dq}^+ + \nu_{dq}^-)}{8\nu_N - (\nu_{dq}^+ - \nu_{dq}^-)} \quad (S9)$$

116 On the contrary, measurement of  $Q$  from expressions from Eqs.S5 is affected by second order corrections and  
117 necessitates the preliminary determination of  $\nu_{1sq}^{\pm}$  and  $\nu_{2sq}^{\pm}$ . As only a part of the sq-dq correlations has been  
118 detected, only half of the sq frequencies could be determined precisely. The observed sq-dq correlations for VO-P1  
119 and VO-P2 correlate the dq transition of the  $m_s = +1/2$  state with one of the sq transitions of the  $m_s = -1/2$  state, and  
120 recalling that  $\nu_{1sq}^- + \nu_{2sq}^- = \nu_{dq}^-$ , all transitions in the  $m_s = -1/2$  state are known without uncertainty due to 2<sup>nd</sup>  
121 order corrections. Single-quantum transitions in the  $m_s = +1/2$  state were obtained to 1<sup>st</sup> order by the equation  
122  $\nu_{1sq}^+ - \nu_{1sq}^- \approx \nu_{2sq}^+ - \nu_{2sq}^- \approx 2\nu_N$  and are thus affected by 2<sup>nd</sup> order corrections. The resulting diagrams for VO-  
123 P complexes are given in Fig.S9. In the absence of unambiguous sq-dq correlations for VO-P3 and VO-P4, we could  
124 not obtain sq frequencies and quadrupolar parameter  $Q$  for these complexes.

125 The second order term in Eqs. S5, S6, S7 and S8 can be estimated as follows. Combining the two dq frequencies gives:

$$126 \quad \nu_{dq}^+ - \nu_{dq}^- = 4\nu_N - \frac{2\nu_N A^{(2)}}{A^2/4 - \nu_N^2} \quad (S10)$$

127 From the experimental values of  $\nu_{dq}^{\pm}$  and from  $\nu_N = 1.1$  MHz, we obtain  $A^{(2)} = 0.55$  MHz and 0.44 MHz in VO-P1  
128 and VO-P2, respectively. This gives a second order contribution  $\frac{A^{(2)}}{(A/2) \pm \nu_N} \approx 0.1 - 0.2$  MHz in Eq. S6 for VO-P  
129 complexes, which corresponds also to the uncertainty in the experimental measurement of dq frequencies in Fig. 6.

130 Concerning second order contributions in the determination of the quadrupolar interaction  $Q$ , expressions for sq

131 frequencies give  $\nu_{1sq}^+ - \nu_{2sq}^+ = 3Q + \frac{Q^{(2)}}{A/2 + \nu_N}$  and  $\nu_{1sq}^- - \nu_{2sq}^- = 3Q + \frac{Q^{(2)}}{A/2 - \nu_N}$ ,

132 which gives an estimation  $Q^{(2)} \approx 0.5$  MHz of the same order as  $A^{(2)}$ , and thus  $\frac{Q^{(2)}}{A/2 \pm \nu_N} \approx 0.1 - 0.2$  MHz.

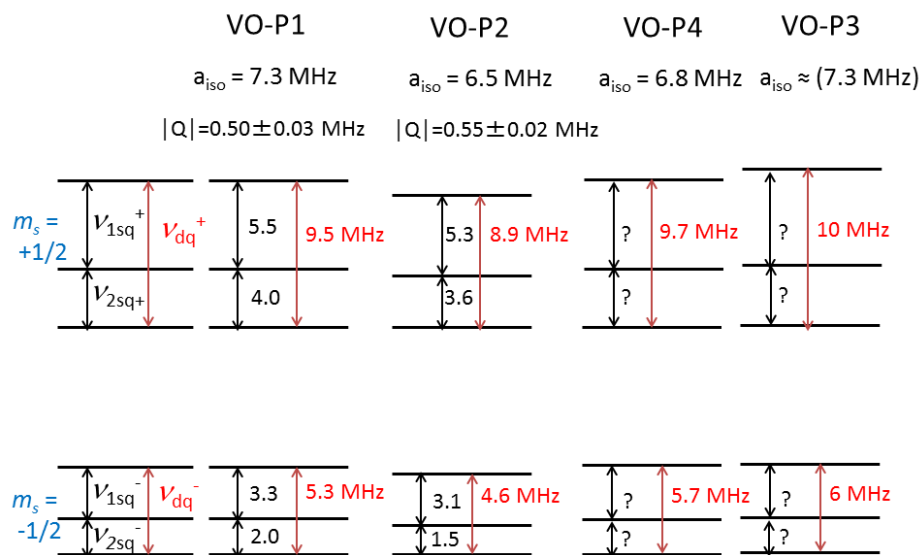

133

**Figure S9.** Energy level diagram of an electron spin  $S = 1/2$  interacting with a nuclear spin  $I = 1$ , showing single quantum (sq) transitions (in black) and double quantum (dq) transitions (in red), with the corresponding diagrams for the four VO-Ps detected in the black matter; the four experimental diagrams correspond to the observation of the EPR transition  $m_I = +3/2$  (for VO-P1, VO-P2 and VO-P4) and  $m_I = -1/2$  for VO-P3; the quadrupolar interaction can be measured from sq transitions only when sq-dq peaks are detectable (VO-P1 and VO-P2);  $a_{iso}$  was deduced from dq-dq transitions obtained with the two EPR transitions  $m_I = -1/2$  and  $m_I = +3/2$ .

134
